# Supplementary material for: Facile and Efficient Syntheses of (11Z,13Z)-Hexadecadienal and Its Derivatives: Key Sex Pheromone and Attractant Components of Notodontidae
Source: MDPI journal article supplement (doi:10.3390/molecules24091781), 2019-05-08
Supplement: s1 [file s1]

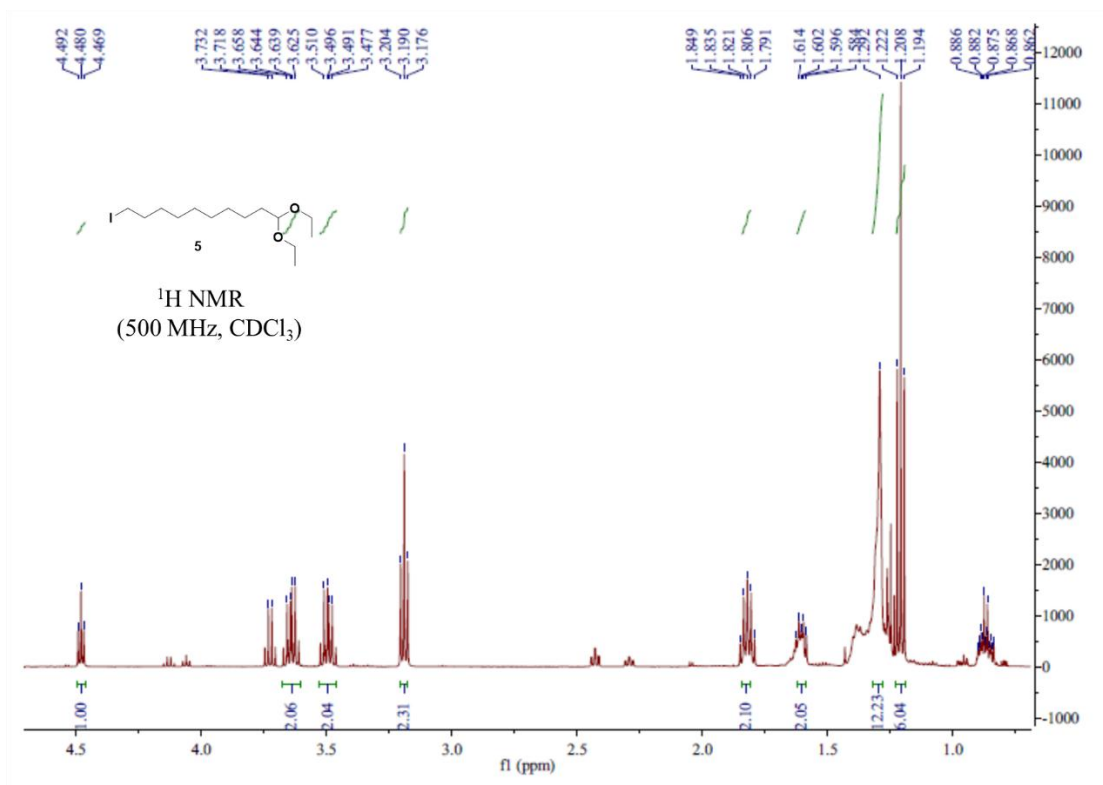

The <sup>1</sup>H NMR spectrum of compound 5

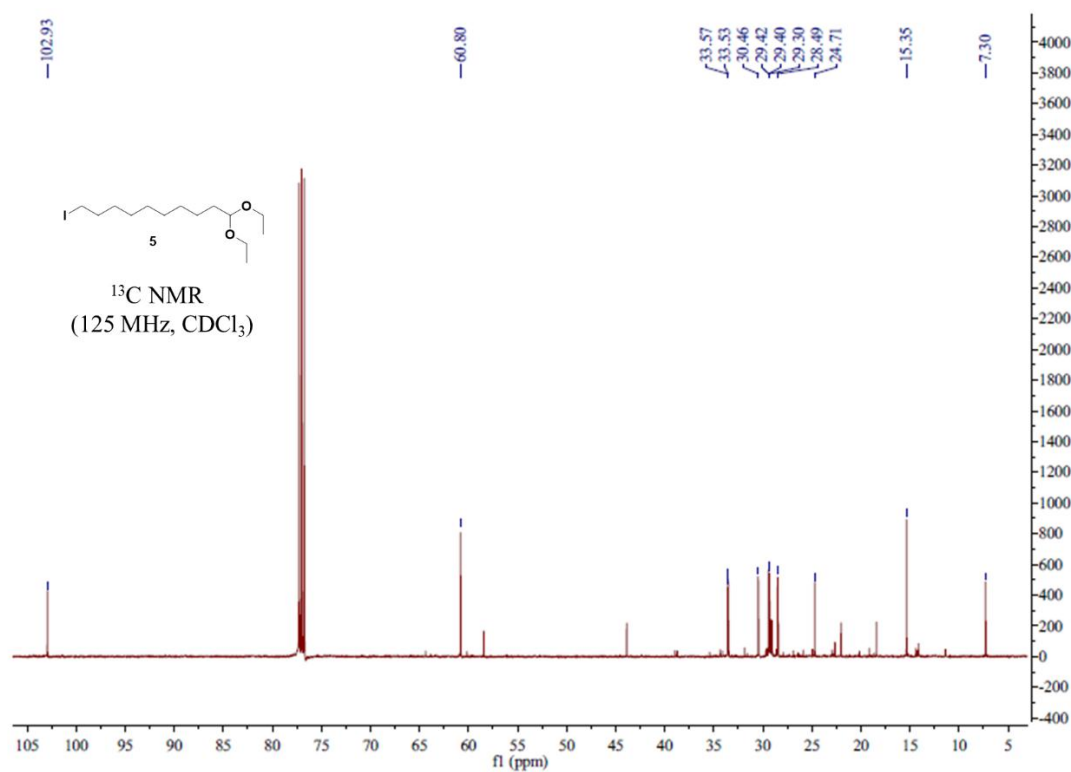

The <sup>13</sup>C NMR spectrum of compound 5

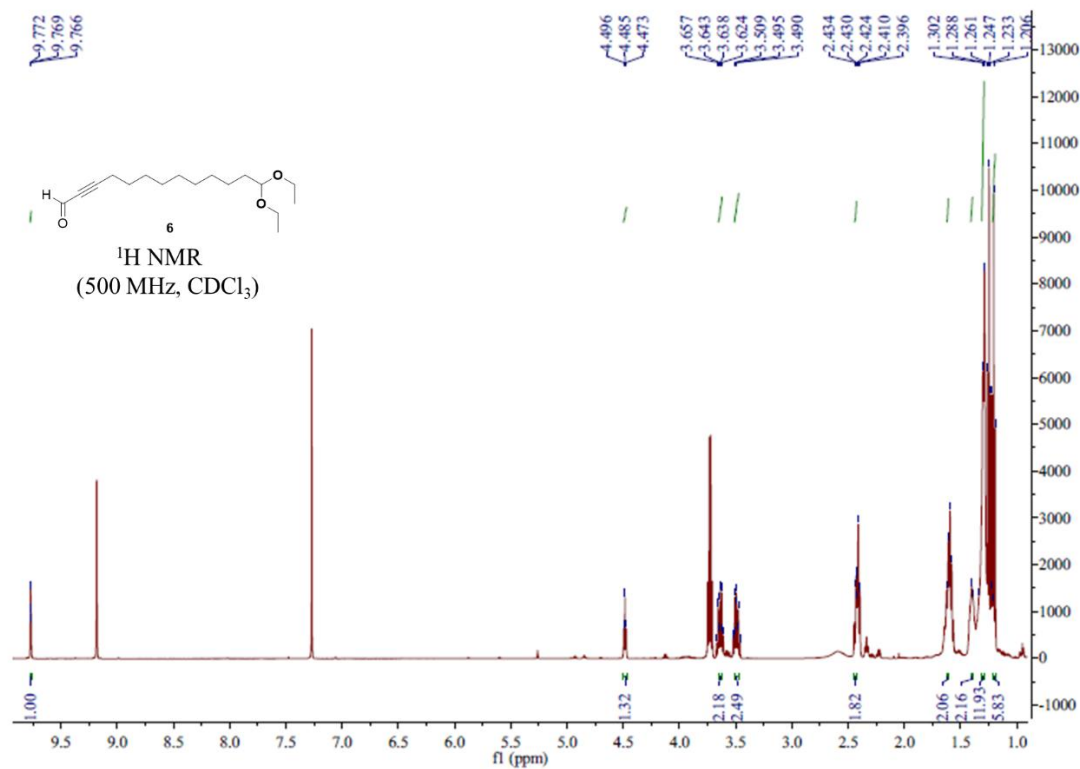

The <sup>1</sup>H NMR spectrum of compound 6

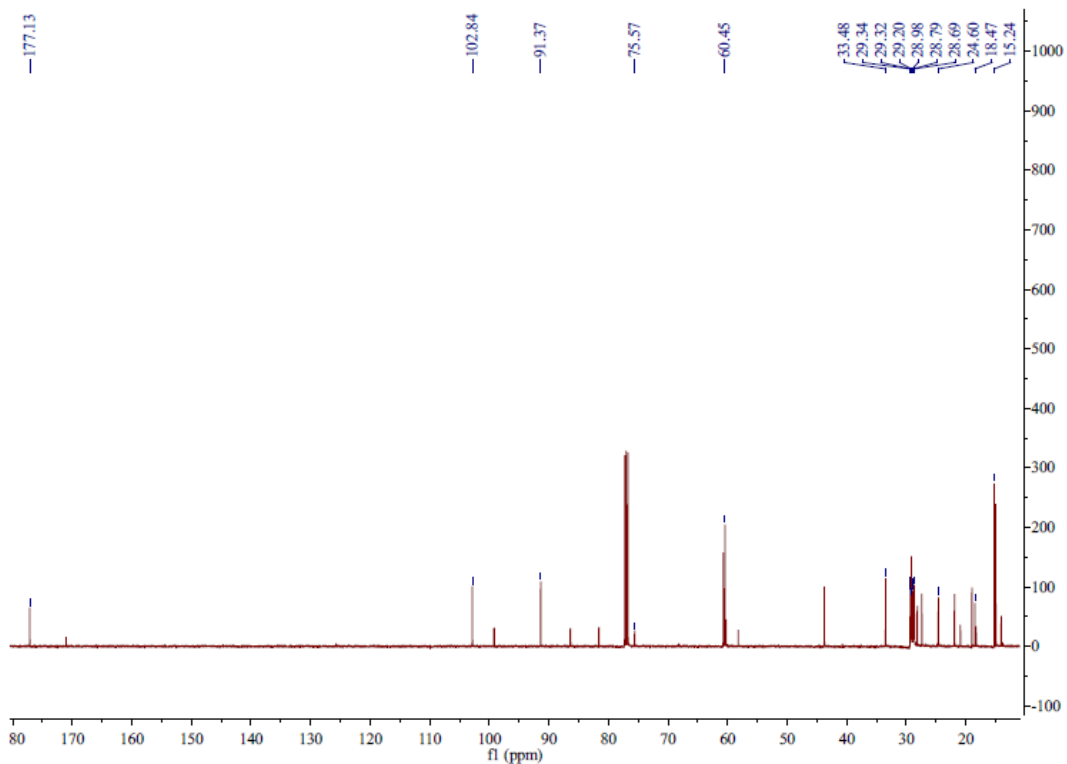

The <sup>13</sup>C NMR spectrum of compound 6

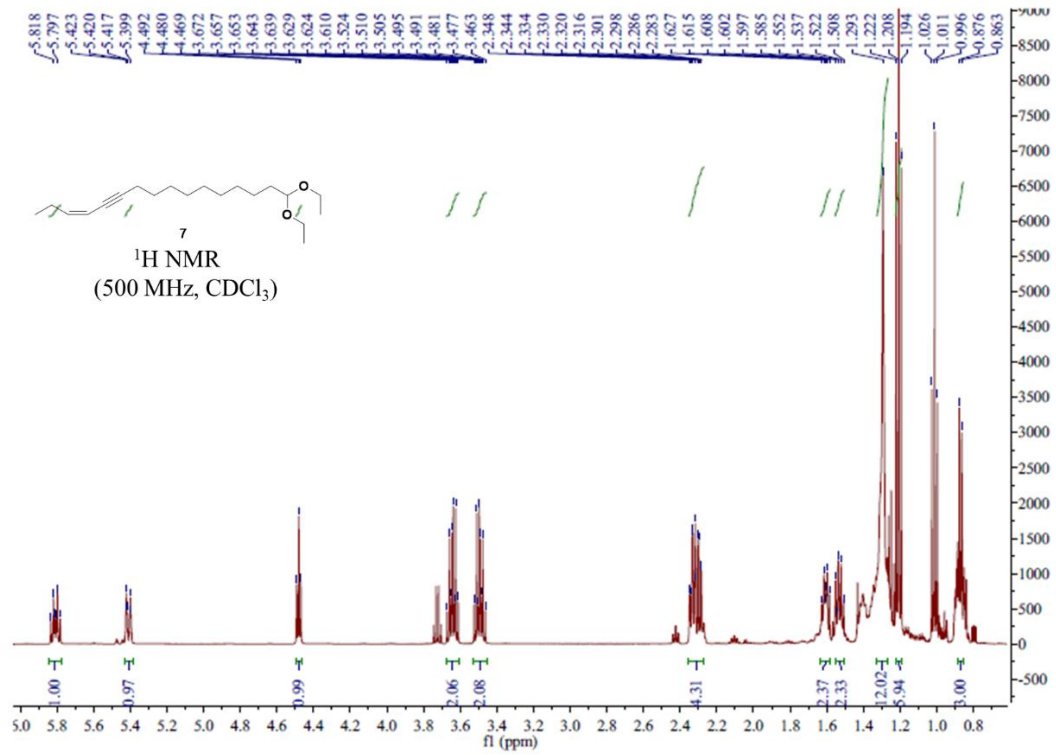

The <sup>1</sup>H NMR spectrum of compound 7

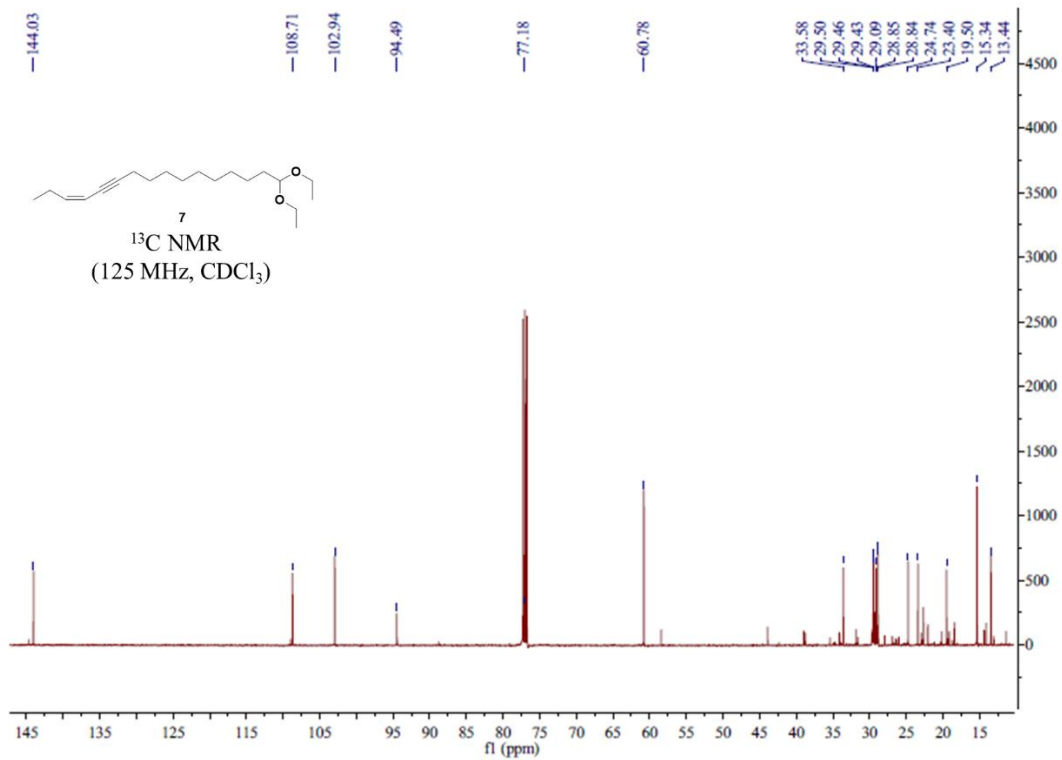

The <sup>13</sup>C NMR spectrum of compound 7

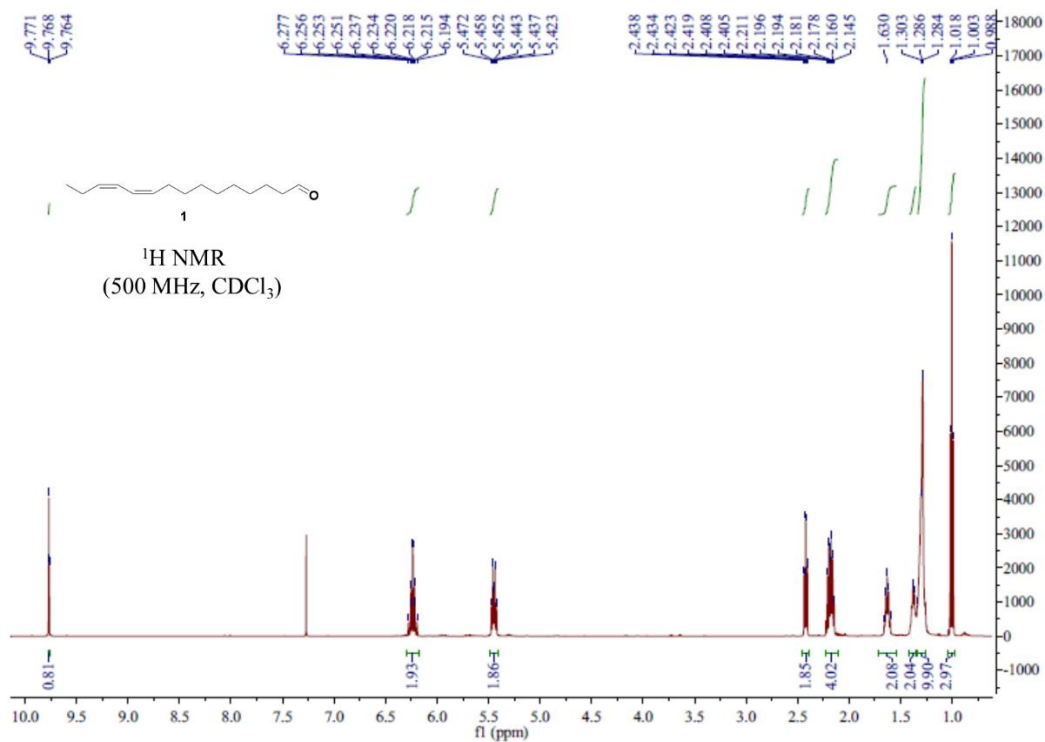

The <sup>1</sup>H NMR spectrum of compound 1

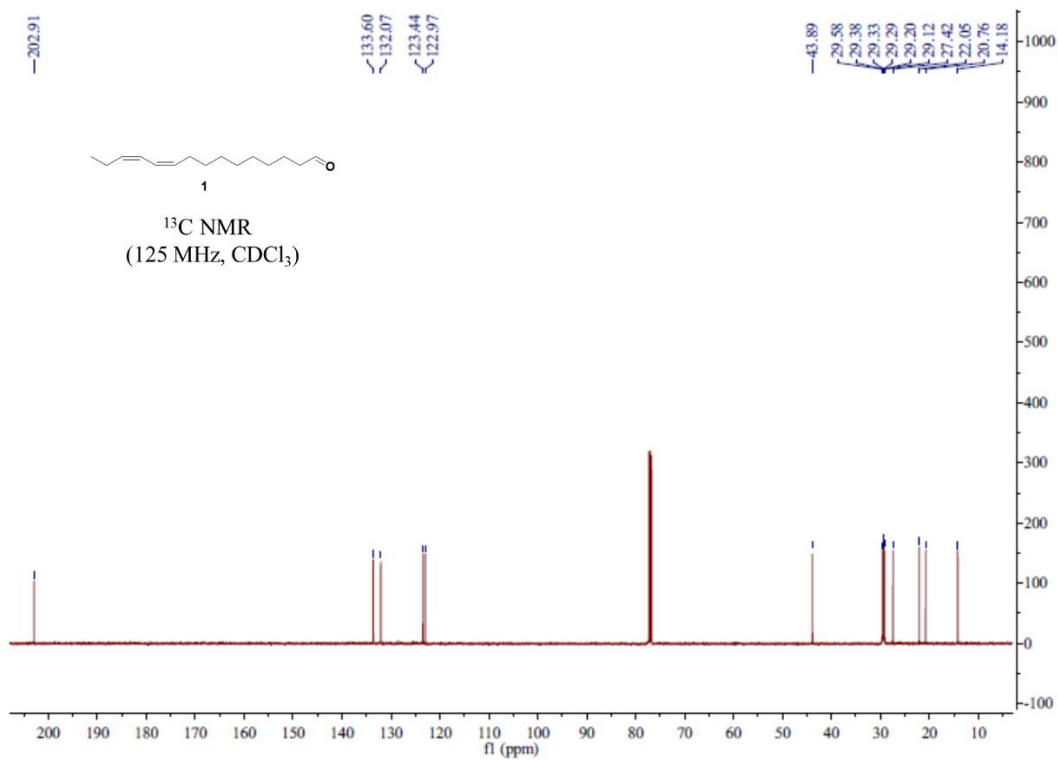

The <sup>13</sup>C NMR spectrum of compound 1

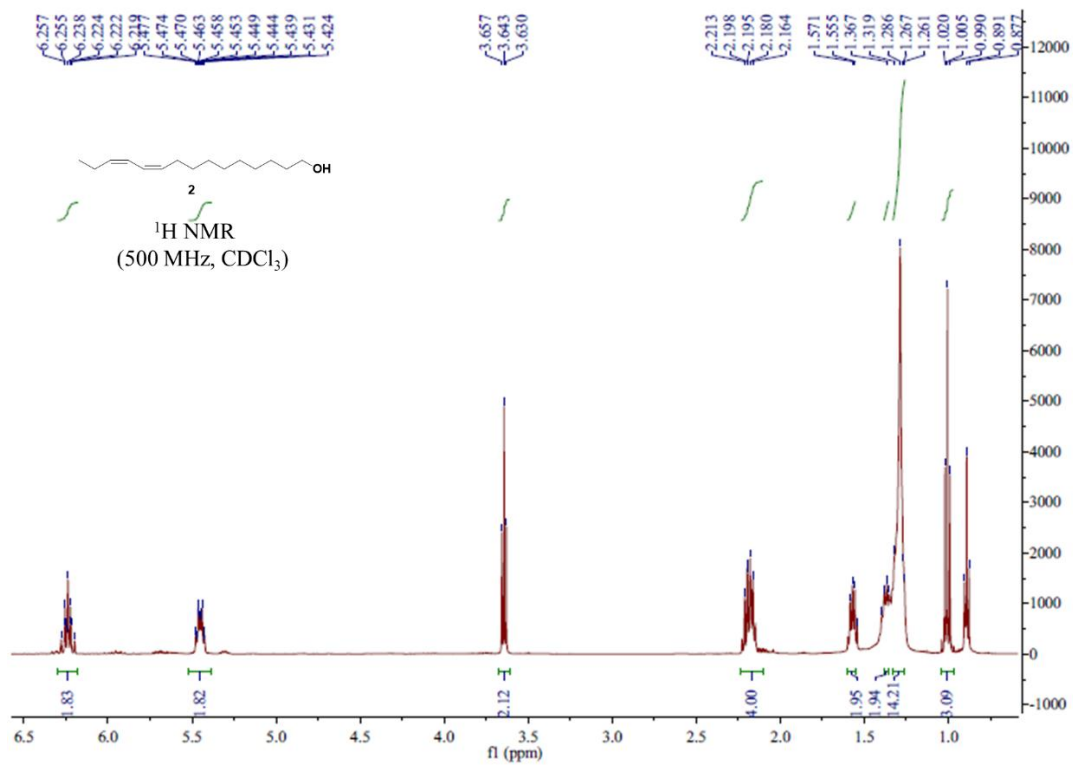

The <sup>1</sup>H NMR spectrum of compound 2

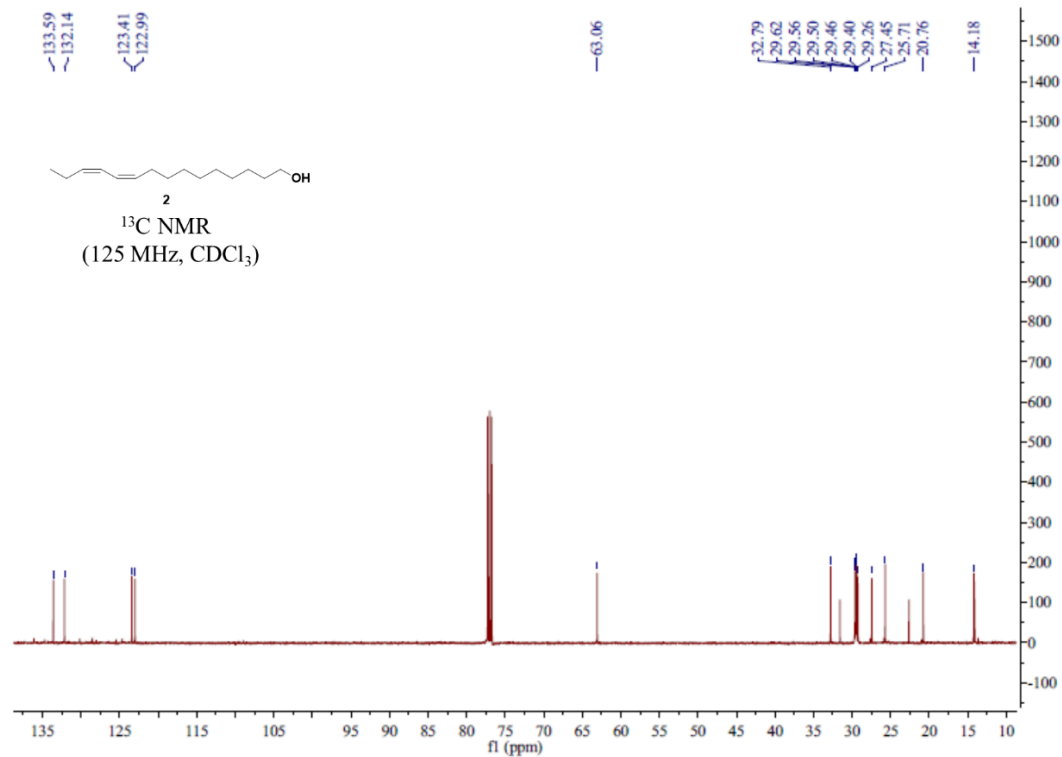

The <sup>13</sup>C NMR spectrum of compound 2

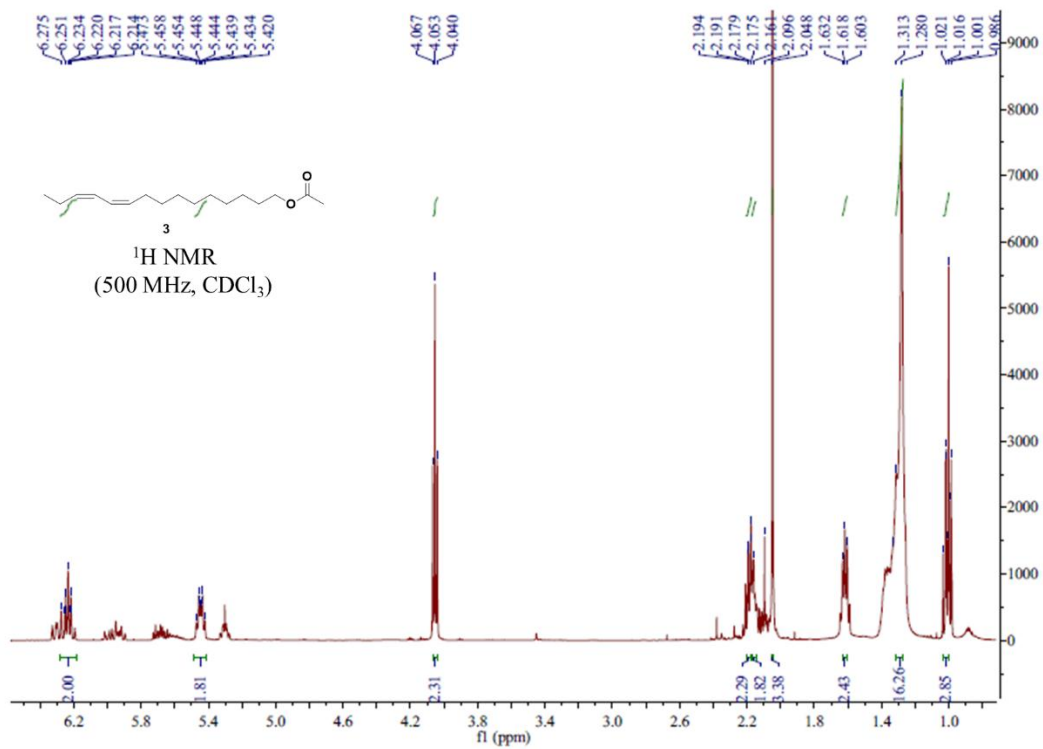

The <sup>1</sup>H NMR spectrum of compound 3

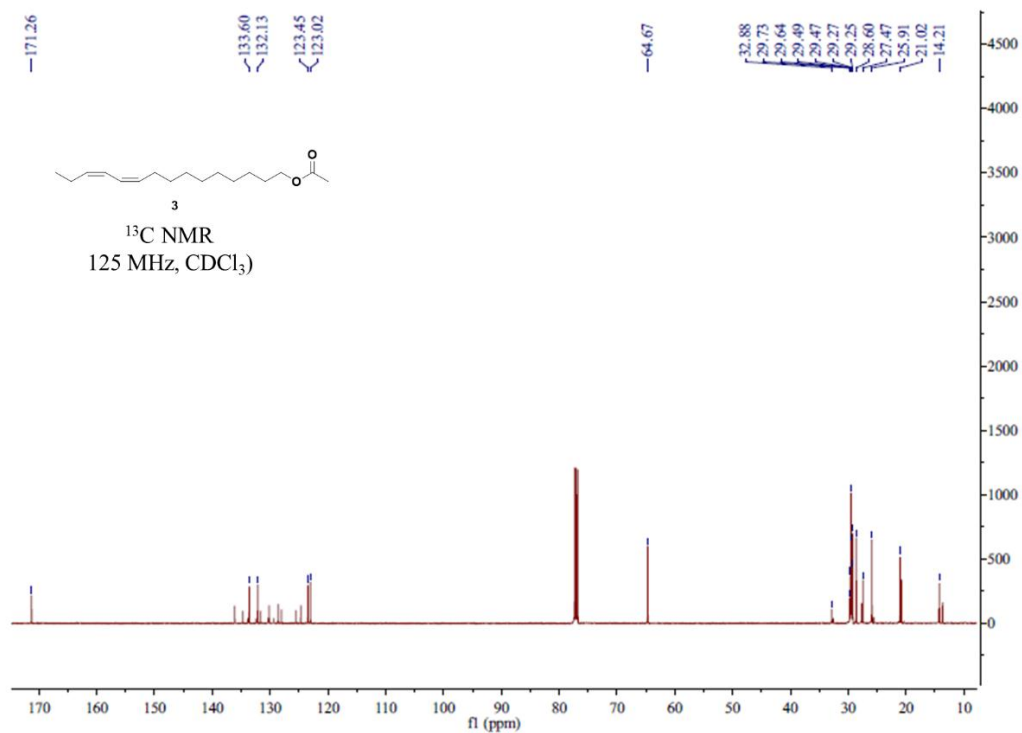

The <sup>13</sup>C NMR spectrum of compound 3

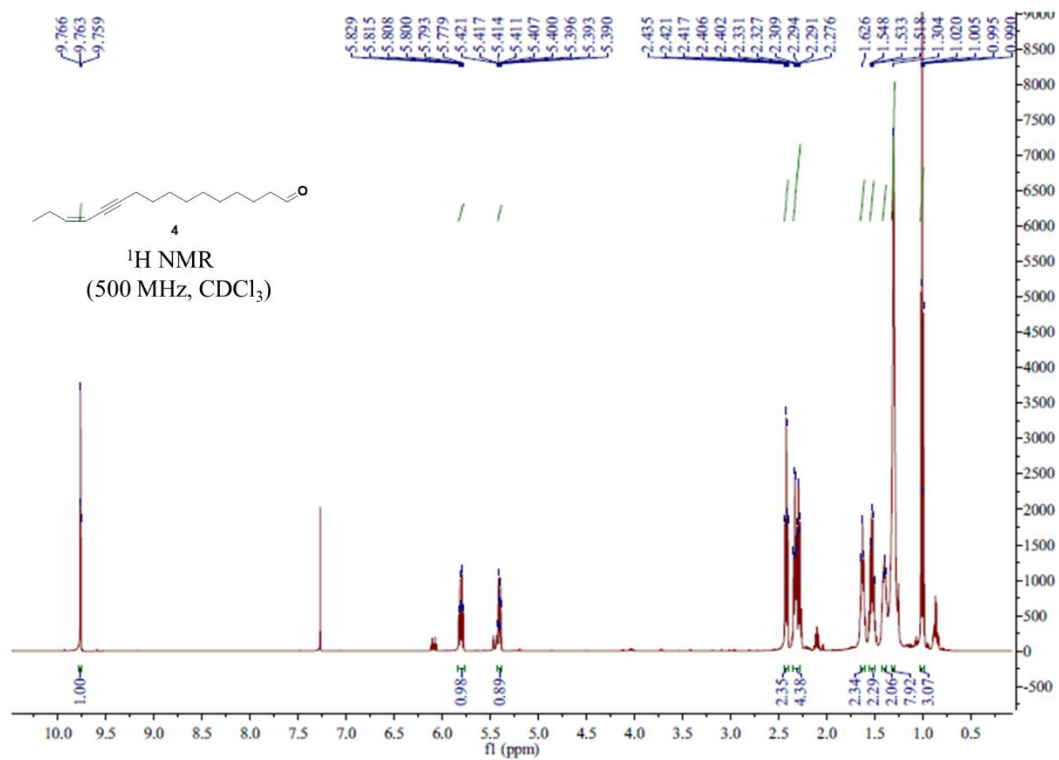

The <sup>1</sup>H NMR spectrum of compound 4

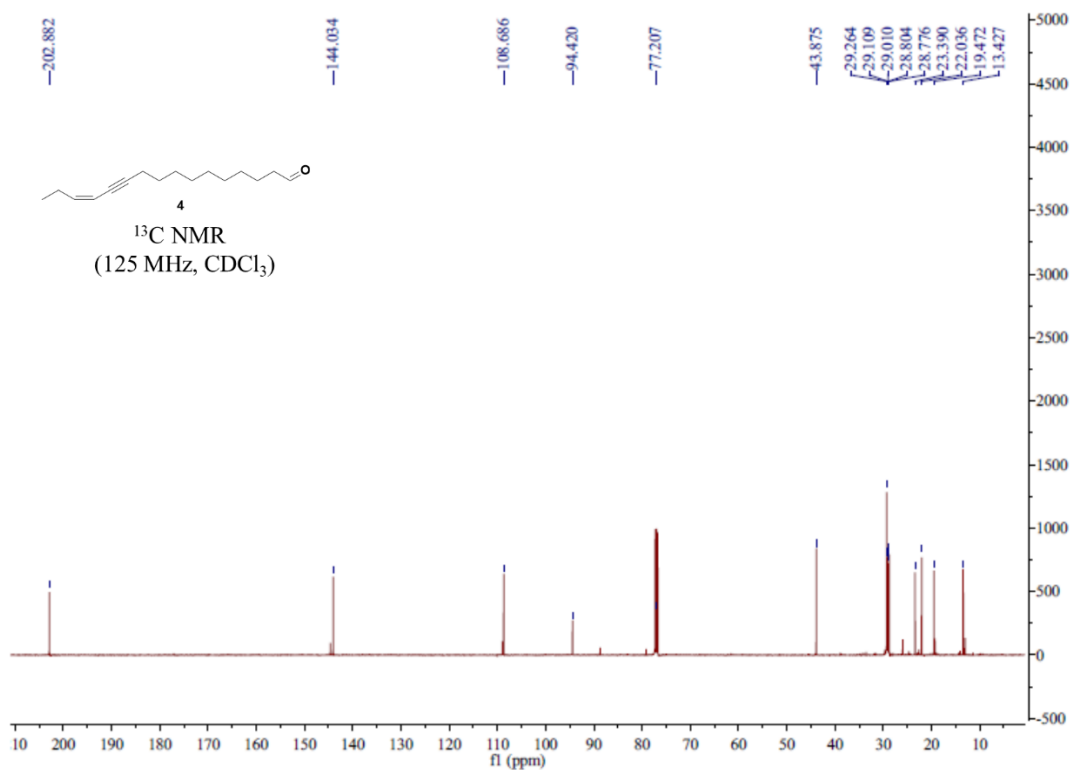

The <sup>13</sup>C NMR spectrum of compound 4
